# Supplementary material
Source: Springer Nature journal article supplement (https://www.springermedizin.de/resource/supplementary/12888_2014_1588_MOESM2_ESM.pdf/9481534)
Supplement: MOESM2 [file 9481534]

**All 36 specialized psychiatric hospitals administered by the Shanghai Bureau of Health**

**1 tertiary mental health center with two hospitals and 266 psychiatrists**

**19 district mental health hospitals with 559 psychiatrists**

**15 inpatient psychiatric rehabilitation centers with 97 psychiatrists**

**Select the Minhang Branch hospital which has 107 psychiatrists**

**Convenience sample of 3 district hospitals with 72 psychiatrists**

**Convenience sample of 2 centers with 8 psychiatrists**

**103 completed survey**

**4 refused**

**69 completed survey**

**3 refused**

**7 completed survey**

**1 refused**

**179 of the 187 recruited psychiatrists (95.7%) completed the survey**
